# Supplementary material for: Catalytic activity of gold nanoparticles protected by quaternary ammonium salt-based gemini surfactants with different spacer structures
Source: Royal Society of Chemistry journal article supplement (doi:10.1039/d3cp01116j), 2023-01-01
Supplement: d3cp01116j1.pdf [file d3cp01116j1.pdf]

## Supplementary Information

### **Catalytic activity of gold nanoparticles protected by quaternary ammonium salt-based gemini surfactants with different spacer structures**

Tsukasa Morita,<sup>a</sup> Shiho Yada <sup>a, 1</sup> and Tomokazu Yoshimura <sup>\*a</sup>

*Department of Chemistry, Faculty of Science, Nara Women's University, Kitauoyanishimachi, Nara 630-8506, Japan*

*1 Present address: Department of Industrial Chemistry, Faculty of Engineering, Tokyo University of Science, 6-3-1 Nijuku, Katsushika-ku, Tokyo 125-0051, Japan*

\*Corresponding author

*E-mail address: yoshimura@cc.nara-wu.ac.jp (T. Yoshimura)*

## S1. Material and methods

### Reduction reaction of *p*-nitrophenol (*p*-NP) into *p*-aminophenol

The reaction rate  $v$  of the reduction reaction of *p*-NP is represented by Eqs. (1) and (2):

$$v = - \frac{d[p\text{-NP}]}{dt} \quad (1)$$

$$= k[p\text{-NP}][\text{NaBH}_4], \quad (2)$$

where  $[p\text{-NP}]$  and  $[\text{NaBH}_4]$  are the concentrations of *p*-NP and sodium borohydride, respectively,  $t$  is the time, and  $k$  is the reaction rate constant. Because the concentration of sodium borohydride is significantly higher than that of *p*-NP ( $[\text{NaBH}_4] \gg [p\text{-NP}]$ ), the second-order reaction in Eq. (2) can be presented as a pseudo-first-order reaction (Eq. (3)):

$$v = k'[p\text{-NP}], \quad (3)$$

where  $k'$  is the pseudo-first-order reaction rate,  $k' = k [\text{NaBH}_4]$ . From Eqs. (1) and (3), Eq. (4) is obtained by integrating over time  $t$  and  $[p\text{-NP}]$  as follows:

$$\ln[p\text{-NP}]_t = \ln[p\text{-NP}]_0 - k't, \quad (4)$$

where  $[p\text{-NP}]_0$  and  $[p\text{-NP}]_t$  are the concentrations of *p*-NP at time 0 and  $t$ , respectively. Using the Lambert–Beer law in Eq. (4), Eq. (5) can be obtained:

$$\ln\left(\frac{A_t}{\varepsilon l}\right) = \ln\left(\frac{A_0}{\varepsilon l}\right) - k't, \quad (5)$$

where  $A_0$  and  $A_t$  are the absorbances of *p*-NP at times 0 and  $t$ , respectively,  $\varepsilon$  is the molar absorption coefficient, and  $l$  is the length of the cuvette (1 cm). Because  $\varepsilon$ ,  $l$ , and  $A_0$  are constants (C), Eq. (5) can be expressed as Eq. (6):

$$\ln(A_t) = -k't + C \quad (6)$$

From Eq. (6), the relationship between the logarithm of the absorbance of *p*-NP at 400 nm ( $\ln A_t$ , herein after referred to as  $\ln A_{400}$ ) and the reaction time  $t$  is linear with the slope  $-k'$ , where  $k'$  is the apparent reaction rate constant and can be calculated from the slope. From the

value of  $k'$ , we evaluated the catalytic activity of gold nanoparticles protected by gemini surfactants for the reduction reaction of *p*-NP.

### **Sodium borohydride and 1,1-diphenyl-2-picrylhydrazyl (DPPH) radical scavenging reaction**

The scavenging reaction of DPPH radicals (DPPH•) by the antioxidant AH is represented by Eq. (7).

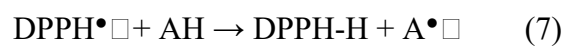

The generated radical A• is stable, and therefore its side reactions with DPPH• (Eq. (8)) or itself (Eq. (9)) can be ignored [27, 28].

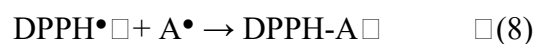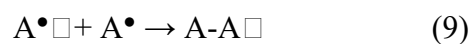

## S2. Dynamic light scattering (DLS)

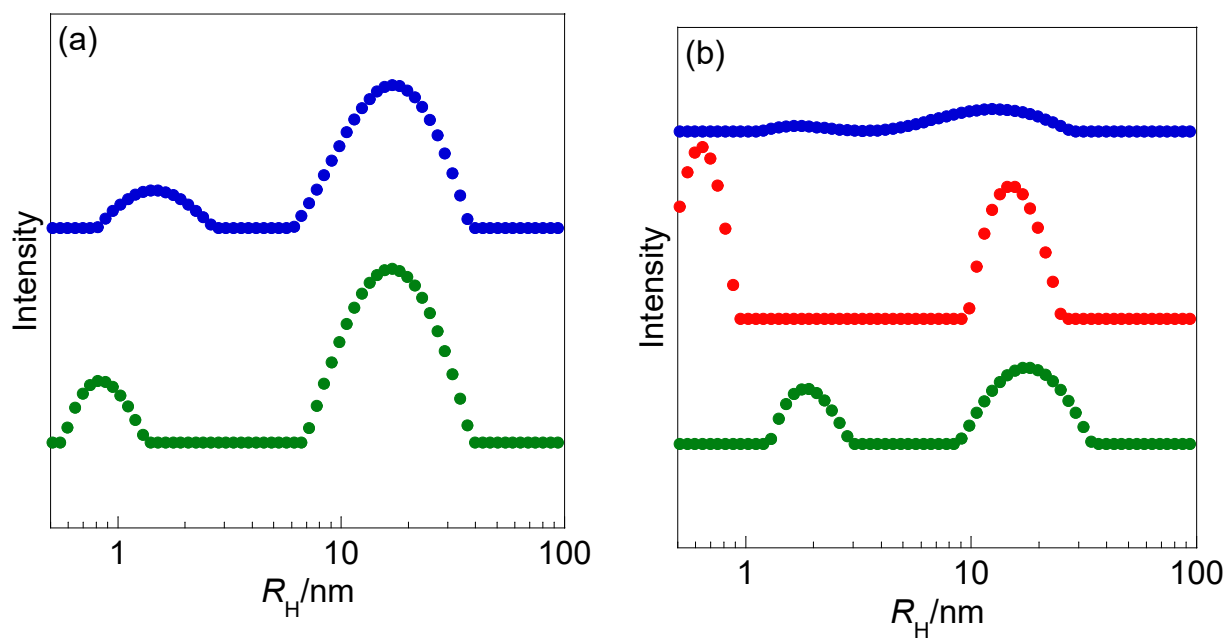

**Fig. S1.** Size distribution of apparent hydrodynamic radius for gold nanoparticles protected by gemini surfactants ( $2C_{12}(\text{Spacer})$ ). (a)  $[2C_{12}(\text{Spacer})]:[\text{Au}] = 1:1$ , (b)  $[2C_{12}(\text{Spacer})]:[\text{Au}] = 4:1$  for  $2C_{12}(2/2\text{-N-}2)$ -gold nanoparticles ( $\bullet$ ),  $2C_{12}(2\text{-N-}2)$ -gold nanoparticles ( $\bullet$ ),  $2C_{12}(2\text{-O-}2)$ -gold nanoparticles ( $\bullet$ ).
